# Supplementary material for: Population-based resistance of Mycobacterium tuberculosis isolates to pyrazinamide and fluoroquinolones: results from a multicountry surveillance project
Source: PubMed Central journal article supplement (PMC5030278; doi:10.1016/s1473-3099(16)30190-6), 2016-10
Supplement: mmc1.pdf [file mmc1.pdf]

# THE LANCET Infectious Diseases

## Supplementary webappendix

This webappendix formed part of the original submission and has been peer reviewed. We post it as supplied by the authors.

Supplement to: Zignol M, Dean AS, Alikhanova N, et al. Population-based resistance of *Mycobacterium tuberculosis* isolates to pyrazinamide and fluoroquinolones: results from a multicountry surveillance project. *Lancet Infect Dis* 2016; published online July 7. [http://dx.doi.org/10.1016/S1473-3099\(16\)30190-6](http://dx.doi.org/10.1016/S1473-3099(16)30190-6).

## Appendix

Profile of countries included in the study. Data already presented elsewhere.

|                                                                | Azerbaijan <sup>1</sup>        | Bangladesh <sup>1</sup>        | Belarus <sup>1</sup>      | Pakistan <sup>1</sup>          | South Africa <sup>1</sup>   |                                   |
|----------------------------------------------------------------|--------------------------------|--------------------------------|---------------------------|--------------------------------|-----------------------------|-----------------------------------|
| TB incidence number (thousands) in 2014                        | 7.4 (6.5-8.3)                  | 360 (320-410)                  | 5.5 (4.7-6.7)             | 500 (370-650)                  | 450 (400-510)               |                                   |
| TB incidence rate (per 100,000) in 2014                        | 77 (68-86)                     | 227 (200-256)                  | 58 (50-67)                | 270 (201-350)                  | 834 (737-936)               |                                   |
| Total TB cases notified in 2014                                | 7,539                          | 196,797                        | 4,274                     | 316,577                        | 318,193                     |                                   |
| Proportion of HIV positive TB patients in 2014                 | 2%                             | 4%                             | 6%                        | <1%                            | 61%                         |                                   |
| Site and year of drug resistance survey                        | Nationwide, 2013 <sup>15</sup> | Nationwide, 2013 <sup>16</sup> | Minsk, 2010 <sup>17</sup> | Nationwide, 2013 <sup>18</sup> | Gauteng, 2014 <sup>19</sup> | Kwazulu Natal, 2014 <sup>19</sup> |
| New TB cases tested and % rifampicin resistance                | 549<br>13.3 (10.6-16.4)        | 1,050<br>1.6 (0.9-2.9)         | 156<br>36.5 (28.9-44.2)   | 1,380<br>4.2 (3.2-5.3)         | 837<br>3.6 (2.1-5.2)        | 499<br>3.5 (1.6-5.5)              |
| Previously treated TB cases tested and % rifampicin resistance | 240<br>28.3 (22.7-34.5)        | 291<br>28.9 (23.9-34.4)        | 68<br>77.9 (67.8-88.1)    | 212<br>19.8 (15.1-22.5)        | 175<br>9.3 (4.8-13.8)       | 141<br>8.8 (3.0-14.6)             |
| All TB cases tested and % rifampicin resistance                | 789<br>17.9 (15.3-20.7)        | 1344*<br>7.3 (5.2-10.1)        | 224<br>49.1 (42.5-55.7)   | 1,592<br>6.3 (5.3-7.5)         | 1,123*<br>4.8 (3.4-6.8)     | 784*<br>4.9 (3.2-7.5)             |

Ranges represent uncertainty intervals. \* Total number includes patients with history of treatment unknown.

Characteristics of patients enrolled in the study. Data already presented elsewhere.

|                      | Azerbaijan <sup>15</sup> | Bangladesh <sup>16</sup> | Belarus<br>(Minsk city) <sup>17</sup> | Pakistan <sup>18</sup> | South Africa<br>(Gauteng) <sup>19</sup> | South Africa<br>(Kwazulu Natal) <sup>19</sup> |
|----------------------|--------------------------|--------------------------|---------------------------------------|------------------------|-----------------------------------------|-----------------------------------------------|
| Total                | 789                      | 1344                     | 224                                   | 1592                   | 1,123                                   | 784                                           |
| - male               | 587, 74.4%               | 949, 70.6%               | 157, 70.1%                            | 884, 55.5%             | 691, 61.5%                              | 483, 61.6%                                    |
| - female             | 202, 25.6%               | 395, 29.4%               | 67, 29.9%                             | 708, 44.5%             | 401, 35.7%                              | 291, 37.1%                                    |
| - unknown            |                          |                          |                                       |                        | 31, 2.8%                                | 10, 1.3%                                      |
| Age group, years     |                          |                          |                                       |                        |                                         |                                               |
| - up to 24           | 178, 22.6%               | 290, 21.6%               | 20, 8.9%                              | 483, 30.3%             | 95, 8.5%                                | 108, 13.8%                                    |
| - 25-34              | 191, 24.2%               | 318, 23.7%               | 54, 24.1%                             | 333, 20.9%             | 369, 32.9%                              | 285, 36.4%                                    |
| - 35-44              | 184, 23.3%               | 216, 16.1%               | 52, 23.2%                             | 232, 14.6%             | 370, 33.0%                              | 206, 26.3%                                    |
| - 45-54              | 133, 16.9%               | 189, 14.1%               | 61, 27.2%                             | 234, 14.7%             | 187, 16.7%                              | 100, 12.8%                                    |
| - 55-64              | 72, 9.1%                 | 175, 13.0%               | 22, 9.8%                              | 171, 10.7%             | 66, 5.9%                                | 47, 6.0%                                      |
| - over 65            | 31, 3.9%                 | 152, 11.3%               | 15, 6.7%                              | 133, 8.4%              | 17, 1.5%                                | 14, 1.8%                                      |
| - unknown            |                          | 4, 0.3%                  |                                       | 6, 0.4%                | 19, 1.7%                                | 24, 3.1%                                      |
| Treatment history    |                          |                          |                                       |                        |                                         |                                               |
| - new                | 549, 69.6%               | 1050, 78.1%              | 156, 69.6%                            | 1380, 86.7%            | 837, 74.5%                              | 499, 63.6%                                    |
| - previously treated | 240, 30.4%               | 291, 21.7%               | 68, 30.4%                             | 212, 13.3%             | 175, 15.6%                              | 141, 18.0%                                    |
| - unknown            |                          | 3, 0.2%                  |                                       |                        | 111, 9.9%                               | 144, 18.4%                                    |

Data are absolute numbers and proportions.
